# Supplementary material for: Diagnostic Accuracy for Gastric Cancer, Adenoma, and Intestinal Metaplasia With vs Without AI Assistance: an observer-based, reader-blinded, randomized case-order exploratory validation study
Source: Research Square preprint supplement (doi:10.21203/rs.3.rs-8110948/v2), 2026-01-13
Supplement: Supplementary file 1 [file 5a65134610696684133aec3e.pdf]

## SUPPLEMENTARY FIGURE LENEDS

### Gastric Endoscopic

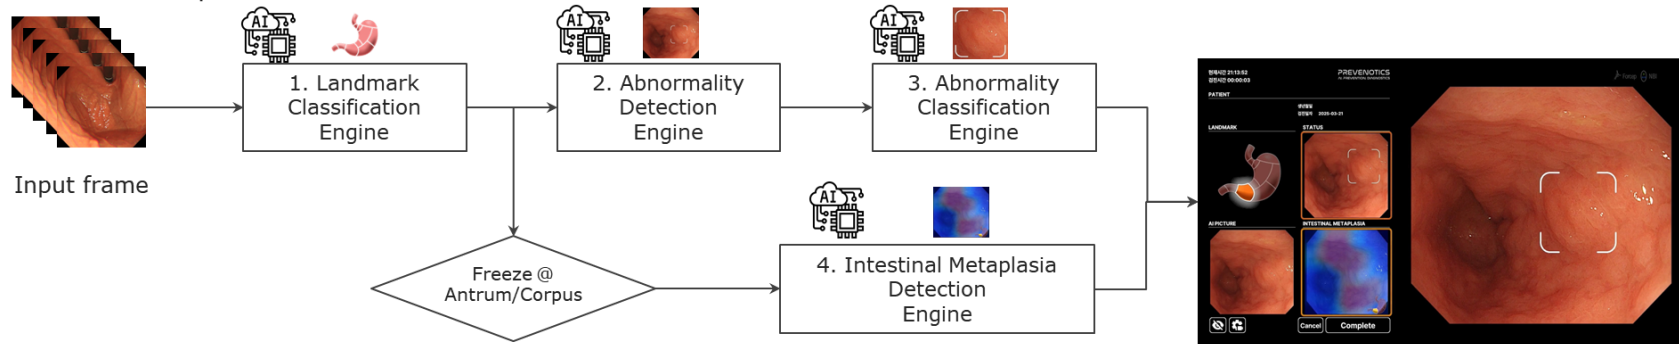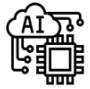

: Customized ViT(Vision Transformer)-based architecture

Supplementary Figure 1. AI pipeline for gastric endoscopy.
